# Supplementary material
Source: PubMed Central journal article supplement (PMC4349393)
Supplement: NIHMS635112-supplement.pdf [file NIHMS635112-supplement.pdf]

# Supplemental Materials

Linear mixed-effects model fit by REML

Data: t2  
AIC BIC logLik  
149861.2 150226.9 -74889.62

Random effects:

Formula: ~date | idpat  
Structure: General positive-definite, Log-Cholesky parametrization  
StdDev Corr  
(Intercept) 1.04244198 (Intr)  
date 0.06148531 -0.552  
Residual 0.66376887

Fixed effects: list(my.formula)

|                                | Value      | Std.Error   | DF    | t-value   | p-value |
|--------------------------------|------------|-------------|-------|-----------|---------|
| (Intercept)                    | -0.0396223 | 0.024804933 | 40959 | -1.59736  | 0.1102  |
| date                           | -0.3597227 | 0.011351583 | 40959 | -31.68921 | 0.0000  |
| date:exposure_2                | 0.1692587  | 0.013222788 | 40959 | 12.80053  | 0.0000  |
| date:exposure_3                | 0.0920916  | 0.023725094 | 40959 | 3.88161   | 0.0001  |
| date:baseline_hbald            | -0.0304261 | 0.000509866 | 40959 | -59.67473 | 0.0000  |
| date:baseline_bmi              | 0.0002438  | 0.000124843 | 40959 | 1.95284   | 0.0508  |
| date:sex                       | 0.0082230  | 0.001443833 | 40959 | 5.69528   | 0.0000  |
| date:age                       | -0.0007498 | 0.000066133 | 40959 | -11.33806 | 0.0000  |
| date:X3                        | 0.0740168  | 0.002357832 | 40959 | 31.39189  | 0.0000  |
| date:X6                        | -0.0530411 | 0.002849846 | 40959 | -18.61194 | 0.0000  |
| date:X9                        | -0.0087072 | 0.001733425 | 40959 | -5.02314  | 0.0000  |
| date:X12                       | -0.0067790 | 0.001256346 | 40959 | -5.39584  | 0.0000  |
| date:X15                       | -0.0021699 | 0.001059605 | 40959 | -2.04788  | 0.0406  |
| date:X18                       | -0.0003382 | 0.000961600 | 40959 | -0.35168  | 0.7251  |
| date:X21                       | -0.0011069 | 0.000915009 | 40959 | -1.20970  | 0.2264  |
| date:exposure_2:baseline_hbald | -0.0049984 | 0.000850579 | 40959 | -5.87651  | 0.0000  |
| date:exposure_2:baseline_bmi   | -0.0009154 | 0.000193550 | 40959 | -4.72947  | 0.0000  |
| date:exposure_2:sex            | -0.0148567 | 0.002303493 | 40959 | -6.44965  | 0.0000  |
| date:exposure_2:age            | -0.0001083 | 0.000108986 | 40959 | -0.99367  | 0.3204  |
| date:exposure_3:baseline_hbald | -0.0015656 | 0.001698609 | 40959 | -0.92170  | 0.3567  |
| date:exposure_3:baseline_bmi   | 0.0007293  | 0.000348503 | 40959 | 2.09252   | 0.0364  |
| date:exposure_3:sex            | -0.0051960 | 0.004369131 | 40959 | -1.18926  | 0.2343  |
| date:exposure_3:age            | 0.0001522  | 0.000210811 | 40959 | 0.72193   | 0.4703  |
| date:exposure_2:X3             | -0.0437612 | 0.003057789 | 40959 | -14.31138 | 0.0000  |
| date:exposure_2:X6             | 0.0398737  | 0.004341362 | 40959 | 9.18461   | 0.0000  |
| date:exposure_2:X9             | 0.0037128  | 0.002918703 | 40959 | 1.27208   | 0.2034  |
| date:exposure_2:X12            | -0.0006382 | 0.002110446 | 40959 | -0.30240  | 0.7624  |
| date:exposure_2:X15            | 0.0014935  | 0.001787501 | 40959 | 0.83551   | 0.4034  |
| date:exposure_2:X18            | -0.0007757 | 0.001615890 | 40959 | -0.48006  | 0.6312  |
| date:exposure_2:X21            | 0.0008197  | 0.001553428 | 40959 | 0.52767   | 0.5977  |
| date:exposure_3:X3             | -0.0279548 | 0.004772579 | 40959 | -5.85739  | 0.0000  |
| date:exposure_3:X6             | 0.0161465  | 0.006880409 | 40959 | 2.34674   | 0.0189  |
| date:exposure_3:X9             | 0.0110690  | 0.004794213 | 40959 | 2.30884   | 0.0210  |
| date:exposure_3:X12            | -0.0007091 | 0.003694135 | 40959 | -0.19194  | 0.8478  |
| date:exposure_3:X15            | 0.0006838  | 0.003329546 | 40959 | 0.20537   | 0.8373  |
| date:exposure_3:X18            | 0.0013442  | 0.003087906 | 40959 | 0.43532   | 0.6633  |
| date:exposure_3:X21            | -0.0019513 | 0.003138572 | 40959 | -0.62172  | 0.5341  |

eTable1a. Fixed effects components of model to predict hbald change. When exposure\_2 and exposure\_3 are 0, model is predicting response to sulfonylurea. When exposure\_2 = 1 and exposure\_3 = 0, the model predicts response to thiazolidinedione. When exposure\_2 = 0 and exposure\_3 = 1, the model predicts response to sulfonylurea. Colons denote interaction term (r syntax), as is usually denoted by an asterisk in other formats.

Linear mixed-effects model fit by REML

Data: t2  
AIC BIC logLik  
58218.17 58514.62 -29068.09

Random effects:

Formula: ~date | idpat  
Structure: General positive-definite, Log-Cholesky parametrization  
StdDev Corr  
(Intercept) 2.6721997 (Intr)  
date 0.2547603 0.04  
Residual 2.5950424

Fixed effects: list(my.formula)

|                                | Value      | Std.Error  | DF   | t-value   | p-value |
|--------------------------------|------------|------------|------|-----------|---------|
| (Intercept)                    | 0.0593326  | 0.18397781 | 5194 | 0.322499  | 0.7471  |
| date                           | 0.6603080  | 0.09711530 | 5194 | 6.799218  | 0.0000  |
| date:exposure_2                | -0.4680743 | 0.12377570 | 5194 | -3.781633 | 0.0002  |
| date:exposure_3                | -0.7926975 | 0.22238533 | 5194 | -3.564522 | 0.0004  |
| date:baseline_hb1ac            | 0.0247700  | 0.00481189 | 5194 | 5.147673  | 0.0000  |
| date:baseline_bmi              | -0.0059192 | 0.00117933 | 5194 | -5.019084 | 0.0000  |
| date:sex                       | -0.0446248 | 0.01378166 | 5194 | -3.237982 | 0.0012  |
| date:age                       | -0.0023288 | 0.00063286 | 5194 | -3.679870 | 0.0002  |
| date:X3                        | -0.0218624 | 0.02113054 | 5194 | -1.034634 | 0.3009  |
| date:X6                        | -0.0085521 | 0.02696790 | 5194 | -0.317122 | 0.7512  |
| date:X9                        | 0.0255139  | 0.01738184 | 5194 | 1.467850  | 0.1422  |
| date:X12                       | -0.0107077 | 0.01308922 | 5194 | -0.818052 | 0.4134  |
| date:X15                       | 0.0102046  | 0.01139744 | 5194 | 0.895341  | 0.3706  |
| date:X18                       | -0.0033149 | 0.01046885 | 5194 | -0.316640 | 0.7515  |
| date:X21                       | 0.0074621  | 0.01033317 | 5194 | 0.722148  | 0.4702  |
| date:exposure_2:baseline_hb1ac | 0.0030626  | 0.00733385 | 5194 | 0.417601  | 0.6763  |
| date:exposure_2:baseline_bmi   | 0.0046314  | 0.00184163 | 5194 | 2.514843  | 0.0119  |
| date:exposure_2:sex            | 0.0789275  | 0.02117138 | 5194 | 3.728030  | 0.0002  |
| date:exposure_2:age            | 0.0009475  | 0.00104312 | 5194 | 0.908301  | 0.3638  |
| date:exposure_3:baseline_hb1ac | -0.0284369 | 0.01597693 | 5194 | -1.779871 | 0.0752  |
| date:exposure_3:baseline_bmi   | -0.0048694 | 0.00315413 | 5194 | -1.543814 | 0.1227  |
| date:exposure_3:sex            | -0.0612017 | 0.04011611 | 5194 | -1.525614 | 0.1272  |
| date:exposure_3:age            | 0.0038339  | 0.00207010 | 5194 | 1.852036  | 0.0641  |
| date:exposure_2:X3             | 0.0829318  | 0.03037574 | 5194 | 2.730197  | 0.0064  |
| date:exposure_2:X6             | -0.0593989 | 0.04294637 | 5194 | -1.383094 | 0.1667  |
| date:exposure_2:X9             | -0.0268357 | 0.02885047 | 5194 | -0.930166 | 0.3523  |
| date:exposure_2:X12            | -0.0052822 | 0.02147625 | 5194 | -0.245957 | 0.8057  |
| date:exposure_2:X15            | 0.0032429  | 0.01846781 | 5194 | 0.175597  | 0.8606  |
| date:exposure_2:X18            | 0.0188146  | 0.01695207 | 5194 | 1.109868  | 0.2671  |
| date:exposure_2:X21            | -0.0165411 | 0.01689197 | 5194 | -0.979226 | 0.3275  |
| date:exposure_3:X3             | 0.1460181  | 0.04539083 | 5194 | 3.216908  | 0.0013  |
| date:exposure_3:X6             | -0.1409086 | 0.06599332 | 5194 | -2.135195 | 0.0328  |
| date:exposure_3:X9             | 0.0305848  | 0.04916083 | 5194 | 0.622137  | 0.5339  |
| date:exposure_3:X12            | -0.0242042 | 0.03779280 | 5194 | -0.640445 | 0.5219  |
| date:exposure_3:X15            | 0.0004284  | 0.03306475 | 5194 | 0.012957  | 0.9897  |
| date:exposure_3:X18            | -0.0034809 | 0.02925160 | 5194 | -0.118999 | 0.9053  |
| date:exposure_3:X21            | -0.0085668 | 0.02913126 | 5194 | -0.294075 | 0.7687  |

eTable1b. Fixed effects components of model to predict weight change. When exposure\_2 and exposure\_3 are 0, model is predicting response to sulfonylurea. When exposure\_2 = 1 and exposure\_3 = 0, the model predicts response to thiazolidinedione. When exposure\_2 = 0 and exposure\_3 = 1, the model predicts response to sulfonylurea. Colons denote interaction term (r syntax), as is usually denoted by an asterisk in other formats.

```
Call:
glm(formula = my.formula, family = binomial, data = t2)
```

```
Deviance Residuals:
    Min       1Q   Median       3Q      Max
-1.9834 -0.9239 -0.6258  1.1414  3.6566
```

```
Coefficients:
              Estimate Std. Error z value Pr(>|z|)
(Intercept)   -1.9136888   0.2694827   -7.101 1.24e-12 ***
exposure_2    -3.3891164   0.5071199   -6.683 2.34e-11 ***
date           0.4860849   0.0500270    9.716 < 2e-16 ***
exposure_3     0.8114058   0.7629484    1.064 0.287549
baseline_hbaldc -0.7963668   0.0258031  -30.863 < 2e-16 ***
baseline_bmi   -0.0143971   0.0046311   -3.109 0.001879 **
sex            -0.4567543   0.0520006   -8.784 < 2e-16 ***
age            0.0070139   0.0023794    2.948 0.003201 **
exposure_2:date 0.2067120   0.0975825    2.118 0.034147 *
date:exposure_3 -0.0226935   0.1461997   -0.155 0.876646
exposure_2:baseline_hbaldc -0.1140420   0.0504240   -2.262 0.023718 *
date:baseline_hbaldc 0.0184237   0.0018505    9.956 < 2e-16 ***
exposure_2:baseline_bmi 0.0475246   0.0080454    5.907 3.48e-09 ***
date:baseline_bmi 0.0005025   0.0003445    1.458 0.144751
exposure_2:sex  0.7162803   0.0919294    7.792 6.61e-15 ***
date:sex        0.0085675   0.0038644    2.217 0.026619 *
exposure_2:age  0.0021790   0.0043786    0.498 0.618733
date:age        0.0006271   0.0001792    3.500 0.000466 ***
exposure_3:baseline_hbaldc -0.2489308   0.0831191   -2.995 0.002746 **
exposure_3:baseline_bmi -0.0104562   0.0118141   -0.885 0.376127
exposure_3:sex  0.4808382   0.1473822    3.263 0.001104 **
exposure_3:age  -0.0226241   0.0071506   -3.164 0.001556 **
date:X3        -0.1010083   0.0097982  -10.309 < 2e-16 ***
date:X6        0.0727579   0.0098303    7.401 1.35e-13 ***
date:X9        0.0141392   0.0050105    2.822 0.004774 **
date:X12       0.0014421   0.0036769    0.392 0.694902
date:X15       0.0114348   0.0030898    3.701 0.000215 ***
date:X18      -0.0036732   0.0026826   -1.369 0.170916
date:X21       0.0017304   0.0024195    0.715 0.474471
exposure_2:date:baseline_hbaldc 0.0023000   0.0033869    0.679 0.497090
exposure_2:date:baseline_bmi -0.0003351   0.0005724   -0.585 0.558282
exposure_2:date:sex -0.0133682   0.0065772   -2.033 0.042102 *
exposure_2:date:age 0.0000740   0.0003145    0.235 0.813980
date:exposure_3:baseline_hbaldc 0.0144271   0.0062010    2.327 0.019988 *
date:exposure_3:baseline_bmi 0.0008656   0.0009673    0.895 0.370852
date:exposure_3:sex -0.0261468   0.0119420   -2.189 0.028562 *
date:exposure_3:age 0.0016081   0.0005908    2.722 0.006492 **
exposure_2:date:X3 0.0015434   0.0186810    0.083 0.934156
exposure_2:date:X6 -0.0100287   0.0180165   -0.557 0.577773
exposure_2:date:X9 -0.0059653   0.0086338   -0.691 0.489612
exposure_2:date:X12 0.0117091   0.0062068    1.887 0.059226 .
exposure_2:date:X15 -0.0059533   0.0051250   -1.162 0.245390
exposure_2:date:X18 0.0070674   0.0043996    1.606 0.108193
exposure_2:date:X21 -0.0005483   0.0039387   -0.139 0.889281
date:exposure_3:X3 -0.0117806   0.0280391   -0.420 0.674376
date:exposure_3:X6 0.0165463   0.0277452    0.596 0.550930
date:exposure_3:X9 -0.0065773   0.0139927   -0.470 0.638317
date:exposure_3:X12 -0.0035593   0.0106597   -0.334 0.738453
date:exposure_3:X15 0.0037482   0.0094855    0.395 0.692729
date:exposure_3:X18 0.0015432   0.0083911    0.184 0.854081
date:exposure_3:X21 -0.0004329   0.0078572   -0.055 0.956064
---
```

```
Signif. codes:  0 '***' 0.001 '**' 0.01 '*' 0.05 '.' 0.1 ' ' 1
```

eTable1b. Model to predict probability of achieving HbA1c < 7%. When exposure\_2 and exposure\_3 are 0, model is predicting response to sulfonylurea. When exposure\_2 = 1 and exposure\_3 = 0, the model predicts response to thiazolidinedione. When exposure\_2 = 0 and exposure\_3 = 1, the model predicts response to sulfonylurea. Colons denote interaction term (r syntax), as is usually denoted by an asterisk in other formats.

| PMID     | author       | year | drug | months | males | age   | age_sd |
|----------|--------------|------|------|--------|-------|-------|--------|
| 11192132 | Einhorn      | 2000 | TZD  | 3.73   | 0.55  | 55.50 | 10.34  |
| 10755495 | Fonseca      | 2000 | TZD  | 6.10   | 0.68  | 58.30 | 8.80   |
| 15562200 | Ahren        | 2004 | DPP4 | 2.80   | 0.70  | 57.90 | 10.00  |
| 15860246 | Feinglos     | 2005 | SU   | 3.73   | 0.46  | 57.70 | 10.70  |
| 15386821 | Matthews     | 2005 | SU   | 12.10  | 0.49  | 57.00 | 9.00   |
| 15386821 | Matthews     | 2005 | TZD  | 12.13  | 0.51  | 56.00 | 9.20   |
| 17130197 | Charbonnel   | 2006 | DPP4 | 5.60   | 0.56  | 54.40 | 10.40  |
| 16367881 | Kvapil       | 2006 | SU   | 3.73   | 0.46  | 58.10 | 8.80   |
| 16842480 | Ristic       | 2006 | SU   | 5.60   | 0.50  | 61.60 | 10.10  |
| 16684436 | Umpierrez    | 2006 | SU   | 6.07   | 0.55  | 51.60 | 11.30  |
| 16684436 | Umpierrez    | 2006 | TZD  | 6.07   | 0.52  | 55.70 | 9.70   |
| 17992639 | Ahren        | 2007 | DPP4 | 12.10  | 0.62  | 58.40 | 9.20   |
| 17277036 | Bosi         | 2007 | DPP4 | 5.60   | 0.62  | 53.90 | 9.50   |
| 17300595 | Nauck        | 2007 | DPP4 | 12.13  | 0.57  | 56.80 | 9.30   |
| 17300595 | Nauck        | 2007 | SU   | 12.13  | 0.61  | 56.60 | 9.80   |
| 17587393 | Ristic       | 2007 | SU   | 12.10  | 0.51  | 61.50 | 10.20  |
| 18034842 | Bolli        | 2008 | DPP4 | 5.60   | 0.62  | 56.30 | 9.30   |
| 18034842 | Bolli        | 2008 | TZD  | 5.60   | 0.64  | 57.00 | 9.70   |
| 18095238 | Hamann       | 2008 | SU   | 12.10  | 0.52  | 59.30 | 9.20   |
| 18095238 | Hamann       | 2008 | TZD  | 12.10  | 0.53  | 58.50 | 9.60   |
| 17765245 | Khanolkar    | 2008 | SU   | 5.60   | 0.60  | 56.00 | 39.54  |
| 17765245 | Khanolkar    | 2008 | TZD  | 5.60   | 0.56  | 59.00 | 39.54  |
| 18194595 | Raz          | 2008 | DPP4 | 7.00   | 0.51  | 53.60 | 9.50   |
| 18201203 | Scott        | 2008 | DPP4 | 4.20   | 0.55  | 55.20 | 9.80   |
| 18201203 | Scott        | 2008 | TZD  | 4.20   | 0.63  | 54.80 | 10.50  |
| 19478198 | Defronzo     | 2009 | DPP4 | 5.60   | 0.54  | 54.80 | 9.60   |
| 19125777 | Ferrannini   | 2009 | DPP4 | 12.13  | 0.53  | 57.50 | 9.06   |
| 19125777 | Ferrannini   | 2009 | SU   | 12.13  | 0.54  | 57.50 | 9.28   |
| 19221978 | Goodman      | 2009 | DPP4 | 5.6    | 0.53  | 54.7  | 10.3   |
| 19309251 | Kaku         | 2009 | TZD  | 6.53   | 0.66  | 52.00 | 8.60   |
| 19125992 | Nauck        | 2009 | DPP4 | 6.07   | 0.47  | 55.00 | 11.00  |
| 18931095 | Nauck        | 2009 | SU   | 6.07   | 0.57  | 57.00 | 9.00   |
| 20580422 | Bergental    | 2010 | DPP4 | 6.07   | 0.52  | 52    | 11     |
| 20580422 | Bergental    | 2010 | TZD  | 6.07   | 0.48  | 53.00 | 10.00  |
| 20536495 | Filozof      | 2010 | DPP4 | 12.13  | 0.52  | 59.2  | 9.9    |
| 20536495 | Filozof      | 2010 | SU   | 12.13  | 0.52  | 59.70 | 10.20  |
| 21059094 | Forst        | 2010 | DPP4 | 2.80   | 0.56  | 61.80 | 9.80   |
| 20846286 | Goke         | 2010 | DPP4 | 12.13  | 0.50  | 57.50 | 10.26  |
| 20846286 | Goke         | 2010 | SU   | 12.13  | 0.54  | 57.60 | 10.37  |
| 20417856 | Pratley      | 2010 | DPP4 | 6.07   | 0.55  | 55.00 | 9.00   |
| 21199268 | Arechavaleta | 2011 | DPP4 | 7.00   | 0.50  | 56.30 | 9.70   |
| 21199268 | Arechavaleta | 2011 | SU   | 7.00   | 0.54  | 56.20 | 10.10  |
| 21114605 | Taskinen     | 2011 | DPP4 | 5.60   | 0.53  | 56.50 | 10.10  |
| 22486990 | Yang         | 2011 | DPP4 | 5.60   | 0.48  | 53.80 | 10.40  |
| 21114607 | Yang         | 2011 | SU   | 3.73   | 0.58  | 53.60 | 9.70   |

| baseline_bmi | baseline_bmi_sd | baseline_hba1c | baseline_hba1 | delta_hba1 | se_hba1c | p_goal |
|--------------|-----------------|----------------|---------------|------------|----------|--------|
| 32.10        | 5.30            | 9.86           | 1.40          | -0.64      | 0.11     |        |
| 29.80        | 3.90            | 8.90           | 1.50          |            |          |        |
| 29.40        | 3.60            | 7.70           | 0.60          | -0.60      | 0.10     | 0.42   |
| 31.70        | 4.40            | 7.45           | 0.78          | -0.66      | 0.10     | 0.69   |
| 32.60        | 5.80            | 8.53           | 0.89          |            | 0.08     |        |
| 32.60        | 5.00            | 8.71           | 1.00          | -0.99      |          |        |
| 30.90        | 5.30            | 7.96           | 0.81          | -0.67      | 0.05     |        |
| 30.50        | 4.40            | 9.40           | 1.40          | -1.70      |          |        |
| 29.50        | 3.60            | 7.60           | 0.58          | -0.57      | 0.08     |        |
| 34.50        | 6.70            | 8.40           | 0.72          | -1.30      | 0.08     | 0.56   |
| 33.80        | 6.60            | 8.31           | 0.77          | -1.23      | 0.07     | 0.55   |
| 29.60        | 3.70            | 7.60           | 0.60          |            | 0.10     | 0.43   |
| 33.20        | 6.10            | 8.40           | 1.00          | -0.90      | 0.10     |        |
| 31.30        | 5.20            | 7.70           | 0.90          | -0.51      | 0.04     | 0.63   |
| 31.20        | 5.00            | 7.60           | 0.90          | -0.56      | 0.04     | 0.59   |
| 30.00        | 3.20            | 7.55           | 0.57          |            | 0.10     | 0.47   |
| 32.20        | 5.60            | 8.40           | 1.00          | -0.90      | 0.10     |        |
| 32.10        | 5.10            | 8.40           | 0.90          | -1.00      | 0.10     | 0.36   |
| 32.20        | 4.90            | 8.00           | 1.00          | -0.86      | 0.11     |        |
| 33.00        | 5.90            | 8.00           | 0.90          | -0.78      | 0.06     |        |
| 33.66        | 8.18            | 7.08           | 0.69          | -1.00      | 0.15     |        |
| 34.55        | 8.83            | 7.33           | 0.52          | -1.19      | 0.13     |        |
| 30.10        | 4.40            | 8.40           | 9.30          | -0.90      | 0.30     |        |
| 30.30        | 4.70            | 7.80           | 1.00          | -0.73      | 0.07     |        |
| 30.40        | 5.50            | 7.70           | 0.80          | -0.79      |          | 0.63   |
| 31.20        | 4.70            | 8.10           | 0.80          | -0.69      | 0.07     |        |
| 31.80        | 5.30            | 7.31           | 0.64          | -0.44      | 0.02     | 0.54   |
| 31.70        | 5.30            | 7.30           | 0.65          | -0.53      | 0.02     | 0.56   |
| 31.7         | 4.6             | 8.5            | 1             | -0.66      | 0.11     |        |
| 25.60        | 4.20            | 7.58           | 1.00          | -0.67      | 0.09     |        |
| 32.00        | 5.00            | 7.90           | 0.70          | -0.60      | 0.10     |        |
| 31.20        | 4.60            | 8.40           | 1.00          | -1.00      | 0.10     | 0.36   |
| 32           | 5               | 8.5            | 1.2           | -0.9       | 0.1      |        |
| 32.00        | 6.00            | 8.50           | 1.10          | -1.20      | 0.10     |        |
| 31.2         | 5               | 8.5            | 1             | -0.81      | 0.06     | 0.296  |
| 30.80        | 5.00            | 8.50           | 1.00          | -0.85      | 0.06     | 0.32   |
| 31.70        | 4.50            | 8.50           | 0.80          | -0.50      | 0.10     | 0.15   |
| 31.50        | 5.70            | 7.70           | 0.90          | -0.74      | 0.04     |        |
| 31.30        | 6.20            | 7.70           | 0.90          | -0.80      | 0.04     |        |
| 32.60        | 5.40            | 8.50           | 0.70          | -0.90      | 0.07     |        |
| 31.50        | 5.70            | 7.50           | 0.70          | -0.46      | 0.04     |        |
| 31.30        | 6.20            | 7.50           | 0.80          | -0.52      | 0.04     |        |
| 29.90        | 4.80            | 8.09           | 0.86          | -0.49      | 0.04     |        |
| 26.30        | 3.60            | 7.90           | 0.80          | -0.78      | 0.10     | 0.47   |
| 25.30        | 3.70            | 8.50           | 1.10          | -1.39      | 0.08     | 0.44   |

| delta_weight |  | se_weight |  |
|--------------|--|-----------|--|
| 0.95         |  | 0.26      |  |
| 1.90         |  |           |  |
| -0.40        |  | 0.20      |  |
| 0.40         |  |           |  |
| 1.40         |  |           |  |
| 1.50         |  |           |  |
| -0.65        |  |           |  |
| 0.10         |  |           |  |
| 1.74         |  | 0.41      |  |
| 1.85         |  | 0.38      |  |
| -0.20        |  | 0.07      |  |
| 0.20         |  | 0.30      |  |
| -1.50        |  | 0.28      |  |
| 1.10         |  | 0.28      |  |
| 0.91         |  |           |  |
| 0.30         |  | 0.20      |  |
| 1.90         |  | 0.20      |  |
| 1.60         |  | 0.30      |  |
| 2.70         |  | 0.30      |  |
| 0.13         |  | -0.50     |  |
| -0.40        |  | 0.20      |  |
| 1.50         |  | 0.23      |  |
| -0.87        |  |           |  |
| -0.23        |  | 0.11      |  |
| 1.56         |  | 0.12      |  |
| -0.19        |  |           |  |
| 1.68         |  |           |  |
| 1.00         |  | 0.20      |  |
| -0.8         |  | 0.33      |  |
| 2.80         |  | 0.31      |  |
| 0.08         |  |           |  |
| 1.36         |  |           |  |
| -0.57        |  |           |  |
| -1.10        |  | 0.20      |  |
| 1.10         |  | 0.16      |  |
| -0.96        |  | 0.30      |  |
| -0.80        |  | 0.15      |  |
| 1.20         |  | 0.15      |  |
| -0.40        |  |           |  |
| -1.05        |  | 0.10      |  |
| 0.10         |  | 0.26      |  |
